# Supplementary material
Source: MDPI journal article supplement (https://www.mdpi.com/2071-1050/12/19/8060)
Supplement: s1 [file s1]

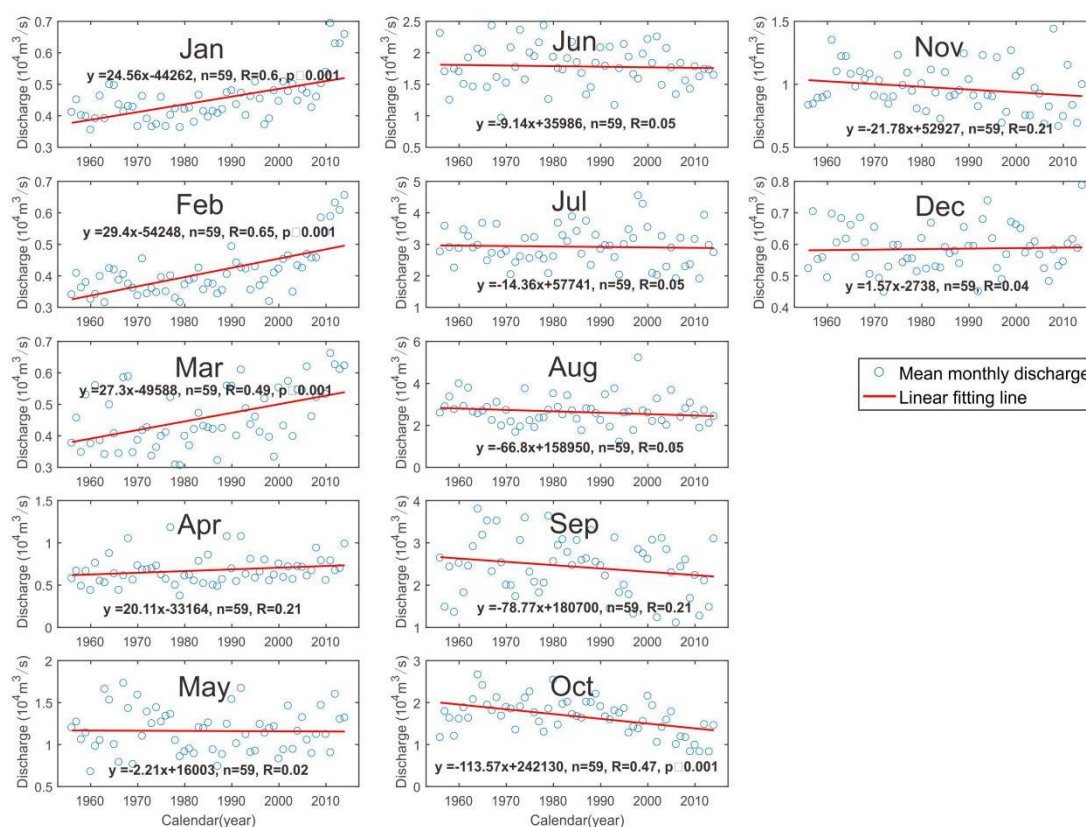

**Figure S1.** Monthly distribution of the discharge at Yichang station in each month from 1956 to 2014. The red solid lines are the fitted results of linear regression.

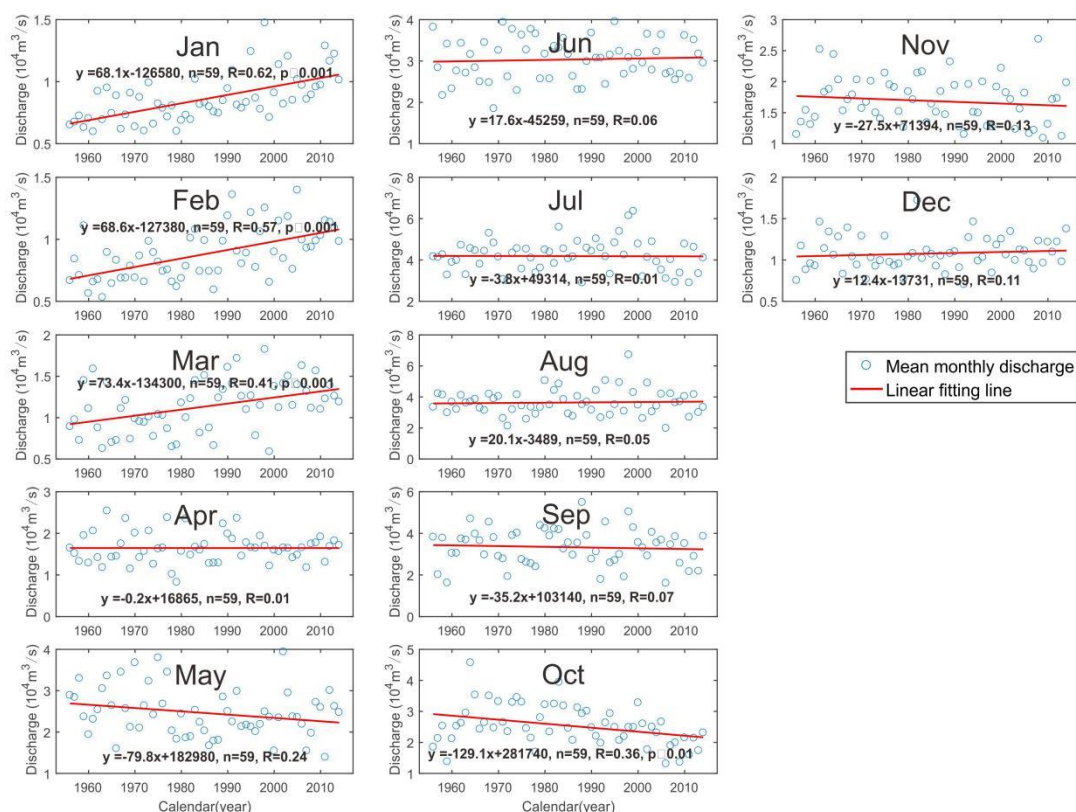

**Figure S2.** Monthly distribution of the discharge at Hankou station in each month from 1956 to 2014. The red solid lines are the fitted results of linear regression.

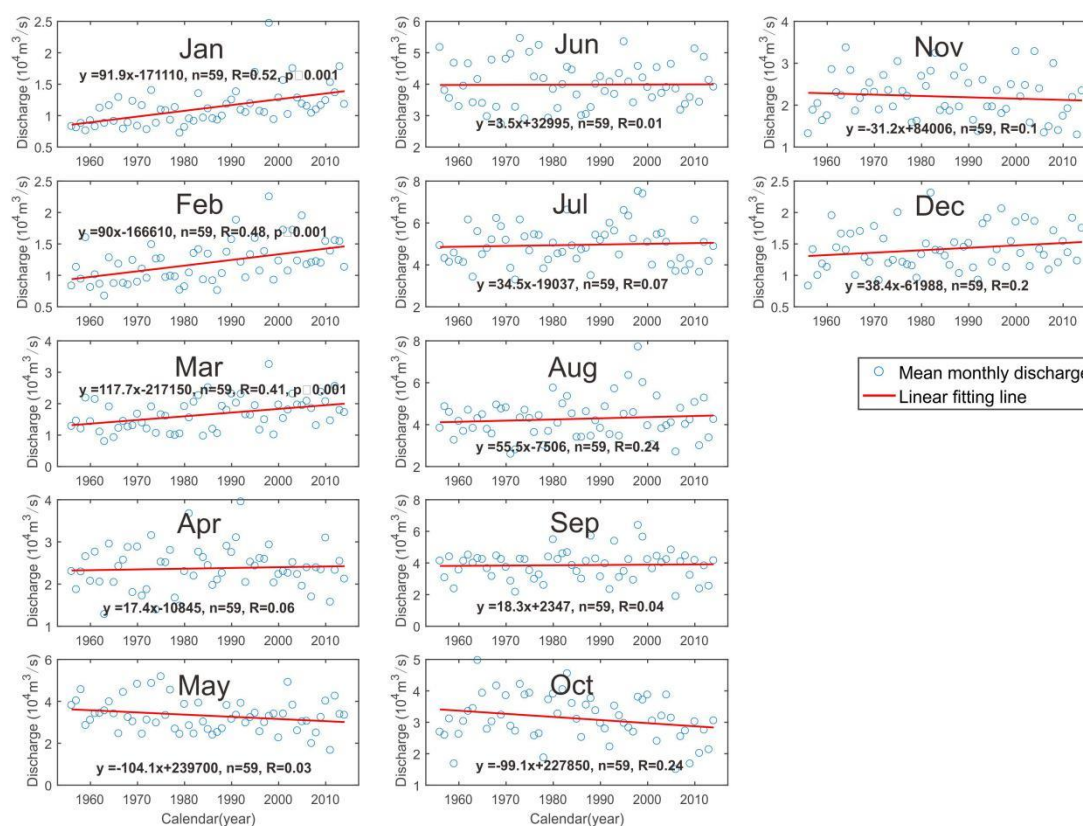

**Figure S3.** Monthly distribution of the discharge at Datong station in each month from 1956 to 2014. The red solid lines are the fitted results of linear regression.
